# Supplementary material
Source: PubMed Central journal article supplement (PMC2797282)
Supplement: supp_M109.006726_jbc.M109.006726-1.pdf [file supp_M109.006726_jbc.M109.006726-1.pdf]

## Supplemental figures

**Supplemental Figure 1: Fluorescence recovery for FRAP experiments depicted in Figure 1.** Percent of original fluorescence was plotted as a function of time following photobleaching for ADFP-YFP and LSDP5-YFP. Data are means  $\pm$  SEM from 7 or 8 experiments.

**Supplemental Figure 2: PAT proteins at the lipid droplet surface recover similarly from 50% photobleaching.** FRAP analysis of perilipin-GFP, ADFP-GFP and LSDP5-YFP in CHO-K1 cells incubated overnight with 400  $\mu$ M oleic acid. Live cells were examined with a confocal microscope using a 40x oil immersion objective. Red boxed regions were bleached at time 0; fluorescence within these regions was monitored at 15 s intervals. Bar: 1  $\mu$ m.

**Supplemental Figure 3: Negative and positive controls used for AFRET experiments.** (A) Confocal imaging of CHO-K1 cells co-transfected with perilipin-YFP and LSDP5-CFP (top), and CGI-58-CFP and perilipin-YFP (bottom). (B) Measurement of AFRET between perilipin-YFP and LSDP5-CFP, and CGI-58-CFP and perilipin-YFP in basal conditions. Data are means  $\pm$  SEM from 10 or 12 experiments. (C) IP of perilipin-YFP and LSDP5-YFP from CHO-K1 cell extracts. Lysates were immunoprecipitated without antibody (None), or with anti-GFP polyclonal antibody, anti-perilipin antibody, or anti-LSDP5 antibody; immunoblots were probed with GFP monoclonal antibody. Experiment is representative of 7 experiments. (D) Co-IP of perilipin A (untagged) with CGI-58-CFP from CHO-K1 cell extracts in basal (B) conditions. IPs were performed with control IgG or anti-CGI-58 antibody. Western blot was first incubated with anti-perilipin antibody and subsequently with anti-CGI-58 antibody. Experiment is representative of 9 experiments.

**Supplemental Figure 4: Untagged HSL interacts with untagged perilipin A.** CHO cells expressing ectopic Perilipin A (Peri A) cells were transduced with HSL adenovirus. Cells were incubated in basal conditions (B) or stimulated conditions (S). IPs were performed using a rabbit anti-HSL IgG or pre-immune rabbit IgG (IgG). Immunoprecipitates were analyzed by Western blot probed with an anti-perilipin antibody or an anti-HSL antibody. Experiment is representative of 2 experiments.

**Supplemental Figure 5: Overexpression of the PAT-1 domain of perilipin prevents binding of phosphorylated HSL to the surfaces of perilipin-coated lipid droplets.** (A) CHO cells stably overexpressing untagged perilipin A (Peri A cells) were co-transfected with either 1) HSL-CFP and a construct driving expression of YFP or 2) CFP-HSL and perilipin (1-121)-YFP. Cells were incubated overnight with 400  $\mu$ M oleic acid. The following day, the cells were incubated with 5  $\mu$ M triacsin C with no further additions (basal), or stimulated for 15 min with 10  $\mu$ M forskolin, 1 mM IBMX and 5  $\mu$ M triacsin C; live cells were examined with confocal microscopy as in Fig 1. Bar, 10  $\mu$ m. (B) Quantitative analysis for HSL binding to the lipid droplet under PKA-stimulated conditions. Data are means  $\pm$  SEM from 8 to 13 experiments (\*,  $p < 0.05$ ).

**Supplemental Figure 6: The PAT-1 domains of both LSDP5 and perilipin interact with HSL.** (A) Western blot of IP of HSL with the PAT-1 domain of perilipin (left; Peri-YFP 1-121)

and the PAT-1 domain of LSDP5 (right; LSDP5-YFP 1-123) from CHO-K1 cell lysates. (B) Western blot of IP of HSL with the full length LSDP5 (top) and the 11-mer repeat sequence (PAT-2 domain) of LSDP5 (right; LSDP5-YFP 11-mer) from CHO-K1 cell lysates. Cells were incubated in basal conditions (B) or stimulated conditions (S). IPs were performed using a rabbit anti-HSL IgG or mouse anti-rabbit (control) IgG (IgG). Immunoprecipitates were analyzed by Western blot probed with a GFP antibody. Experiment is representative of 2 experiments.

**Supplemental Figure 7: The phosphorylation of serine 81, 222, 276 of perilipin is required for recruitment of HSL to perilipin-coated lipid droplets.** Complete set of representative confocal images for Figure 6, including images for the YFP channel, CFP channel and merged images. Cells were incubated overnight with 400  $\mu$ M oleic acid. The following day, the cells were incubated with 5  $\mu$ M triacsin C (basal) or stimulated for 10 min with 10  $\mu$ M forskolin, 1 mM IBMX and 5  $\mu$ M triacsin C; live cells were examined with a confocal microscope as in Fig 1. Bar, 10  $\mu$ m.

**Supplemental Figure 8: HSL binding to perilipin requires the phosphorylation of serine 81, 222 and 276 of perilipin A.** (A) Representative Western blot of IPs of HSL with mutated forms of perilipin. Plasmids for S81A Perilipin-YFP, S222A perilipin-YFP, S276A perilipin-YFP, perilipin S<sup>TriA</sup>-YFP, and perilipin S<sup>QuadA</sup>-YFP were transfected into CHO-K1 cells stably expressing HSL-GFP. Cells were incubated in basal (B) and stimulated (S) conditions. Cell extracts were used for IP with control rabbit pre-immune IgG or rabbit anti-mouse HSL IgG, and Western blots were probed using a GFP antibody. Experiment depicted is representative of three experiments.

# Supplemental Figure 1

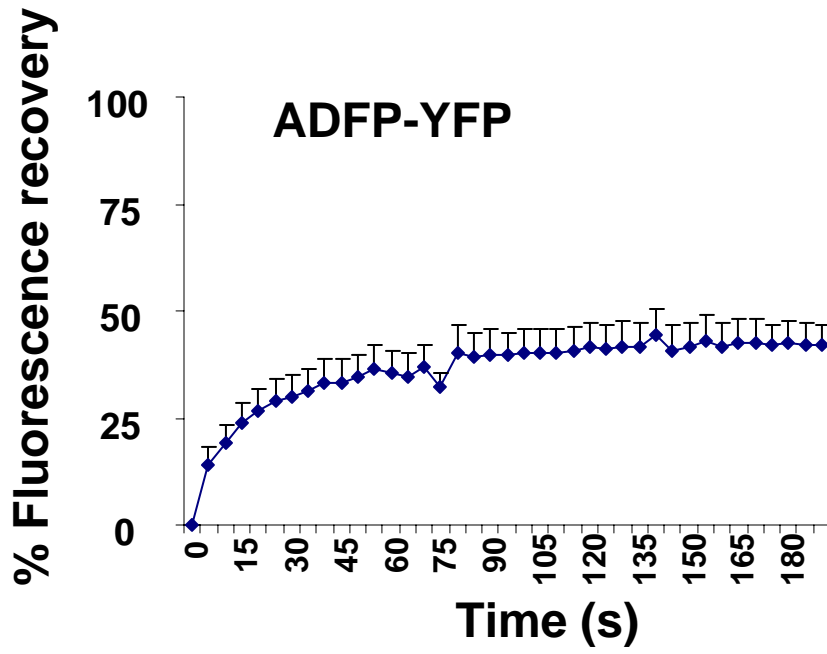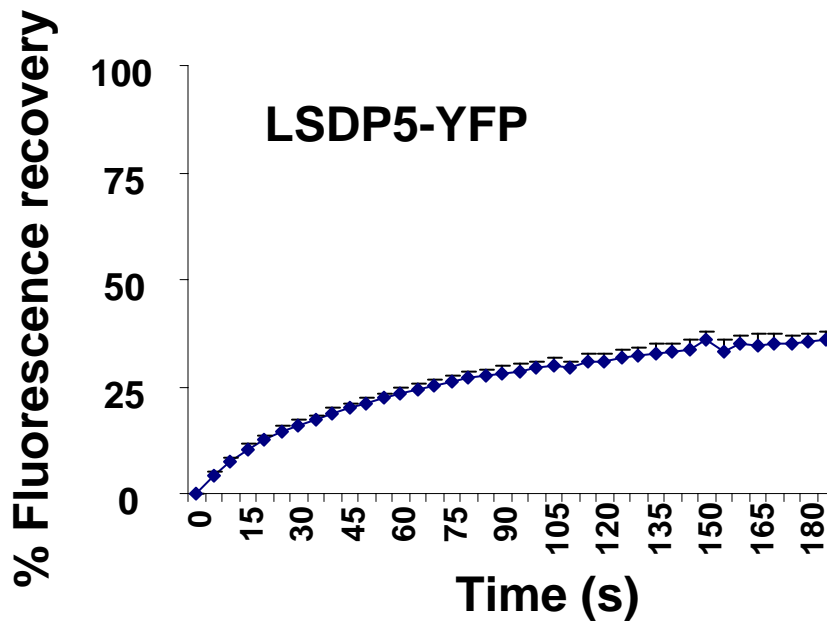

# Supplemental Figure 2

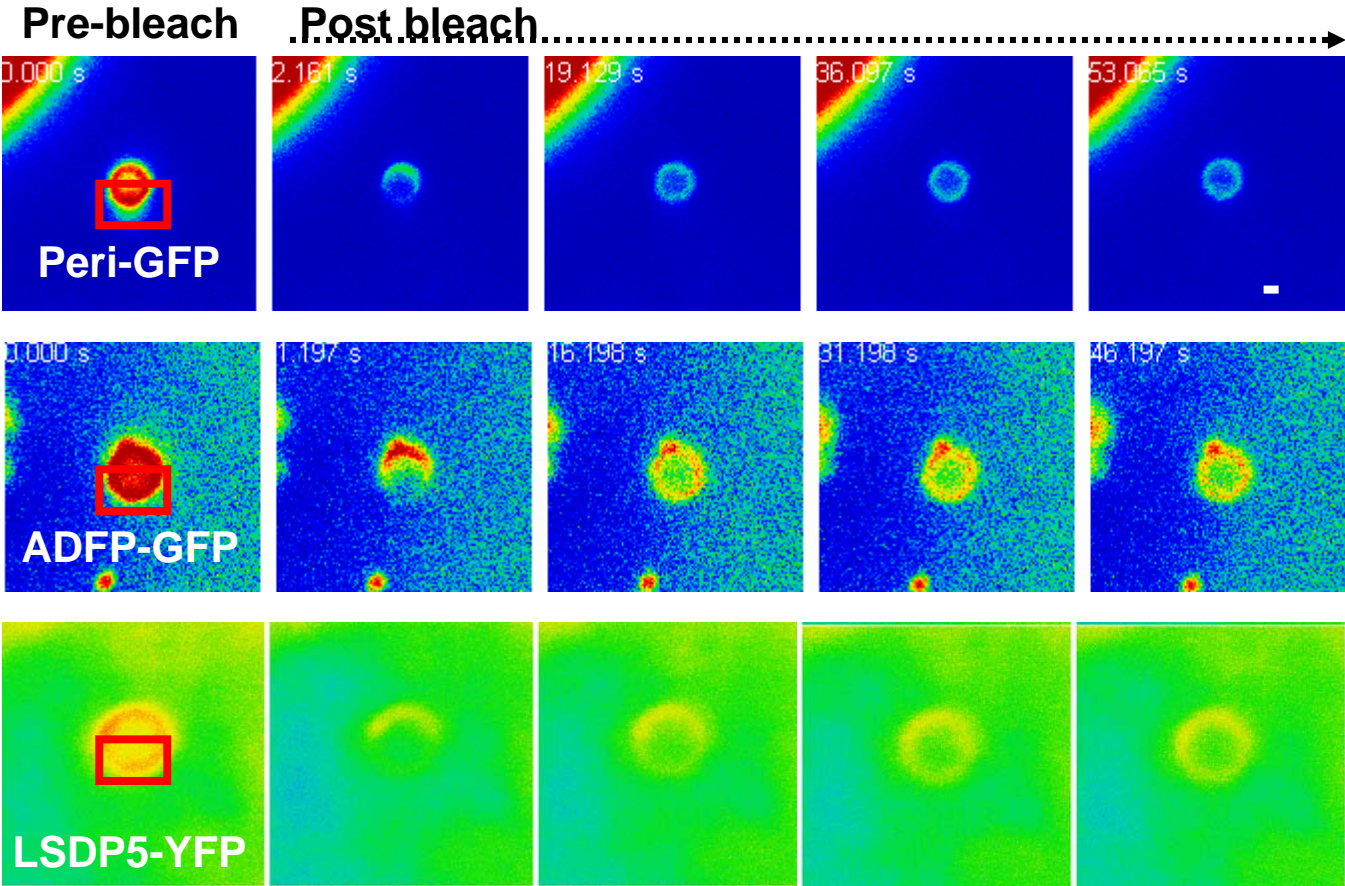

### Supplemental Figure 3

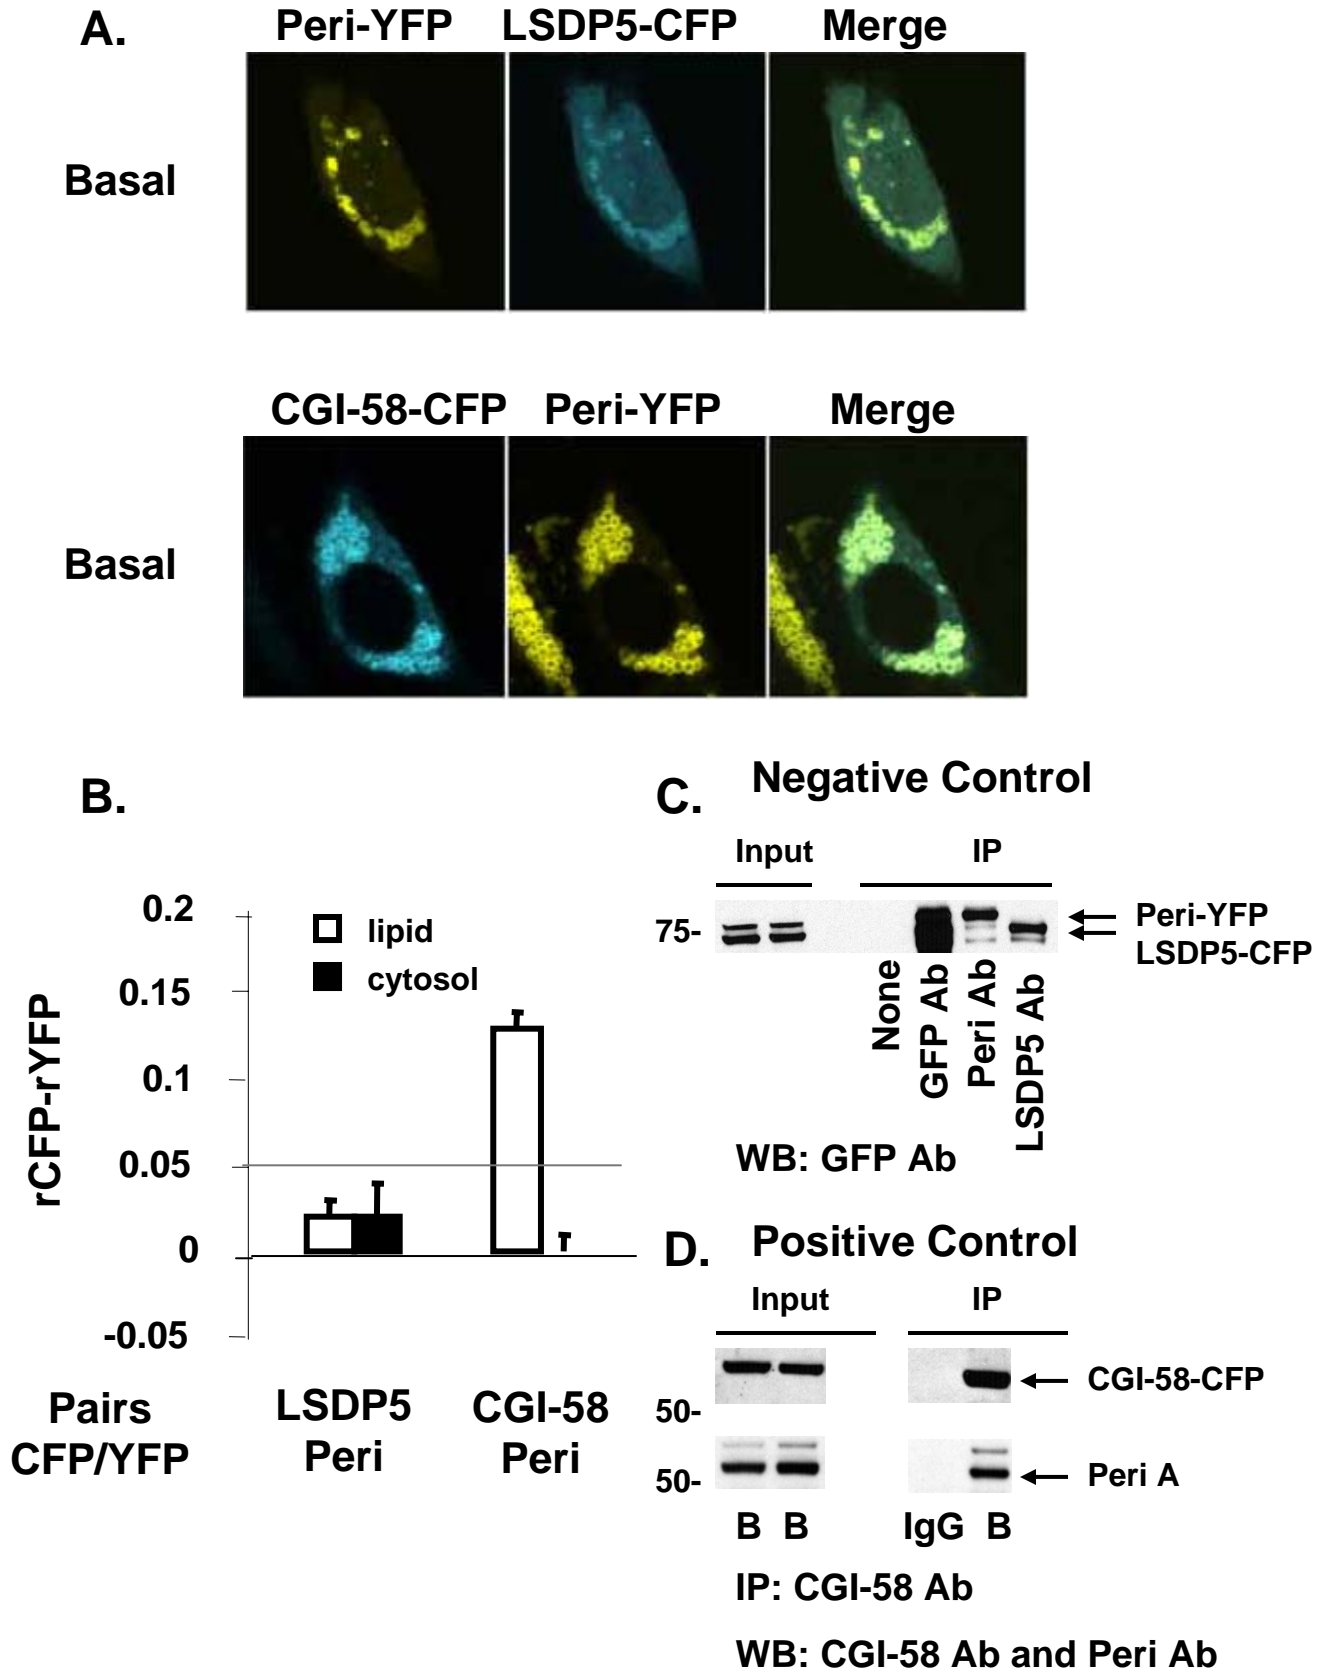

# Supplemental Figure 4

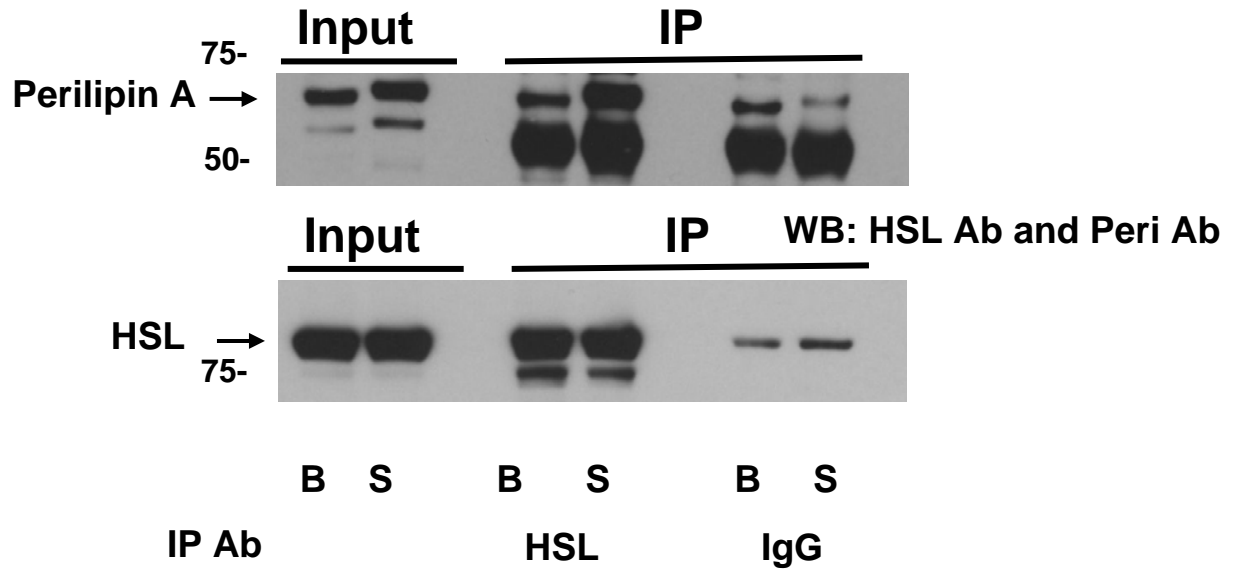

## Supplemental Figure 5

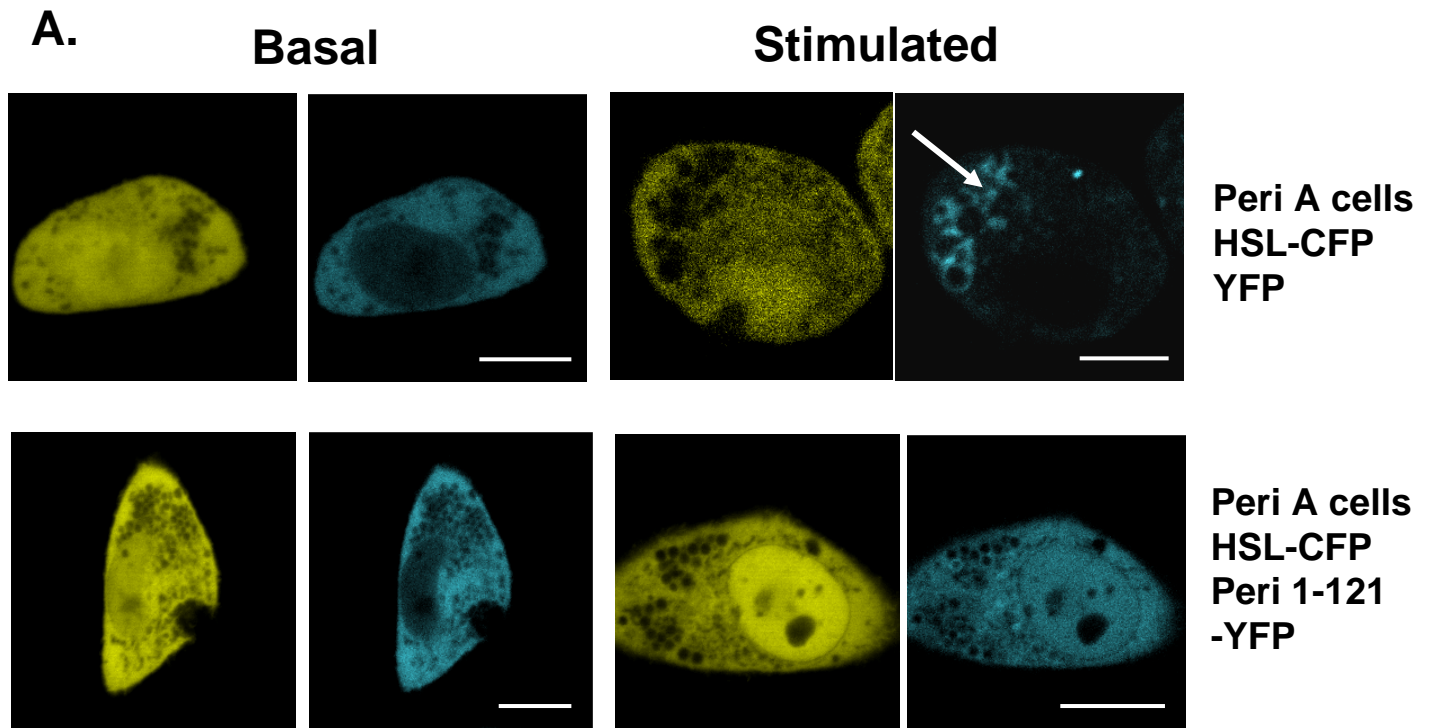

## B.

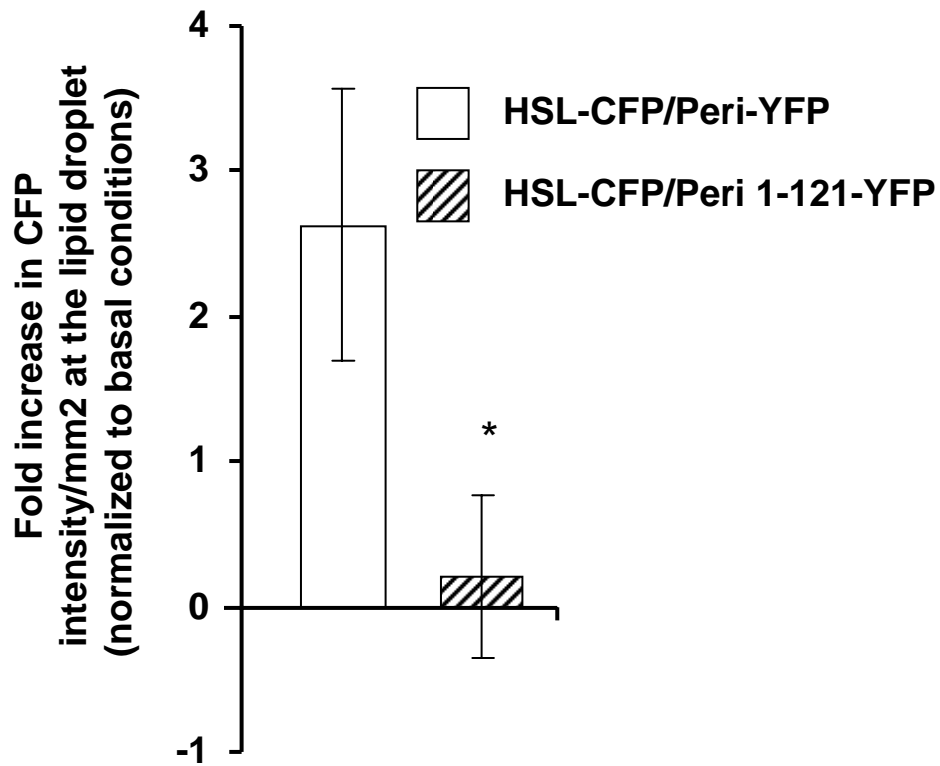

## Supplement Figure 6

A.

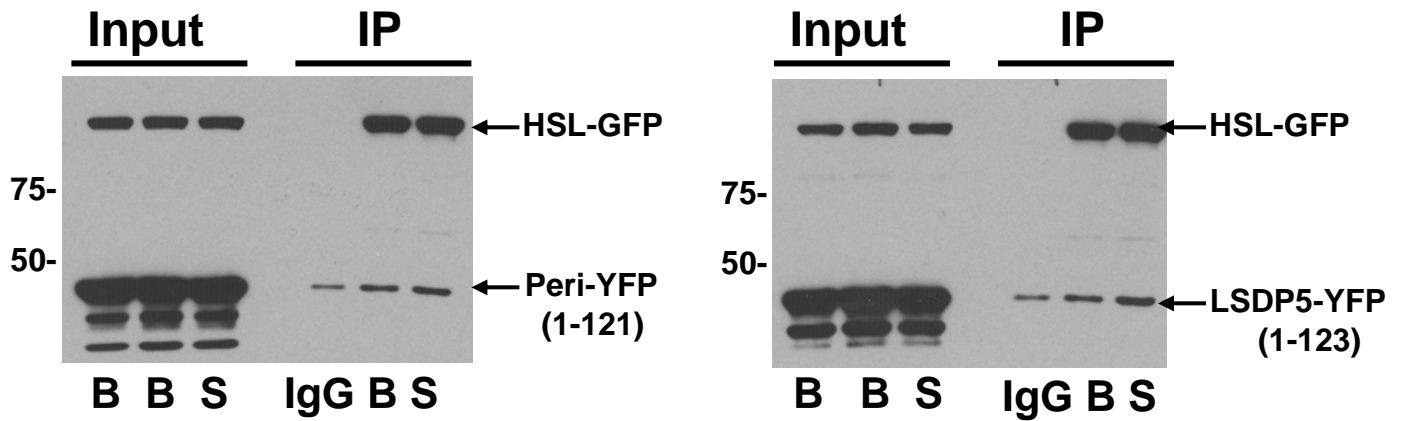

B.

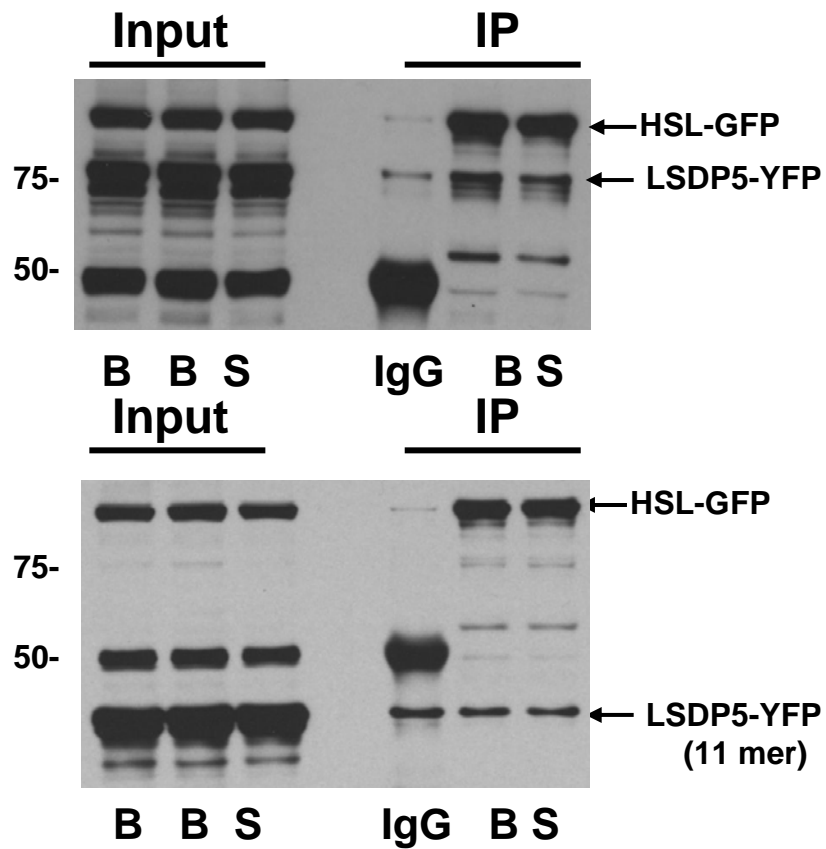



# Supplement Figure 7A

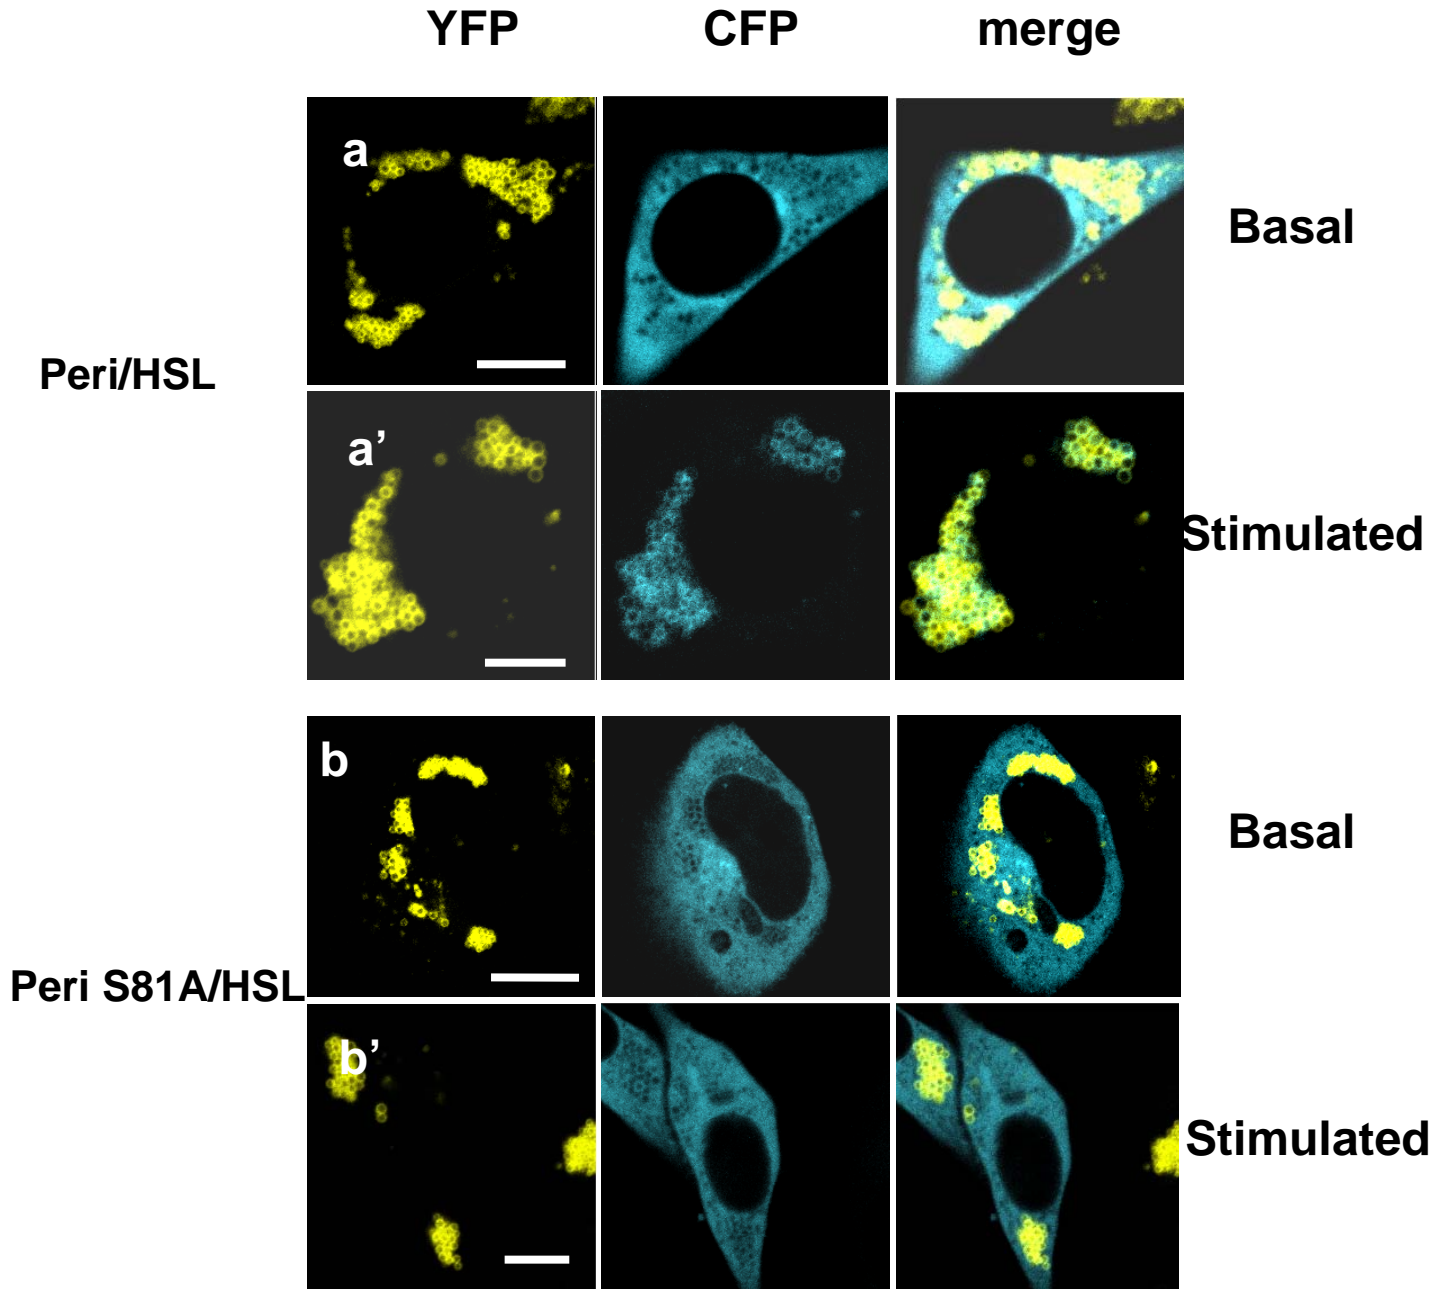

# Supplement Figure 7B

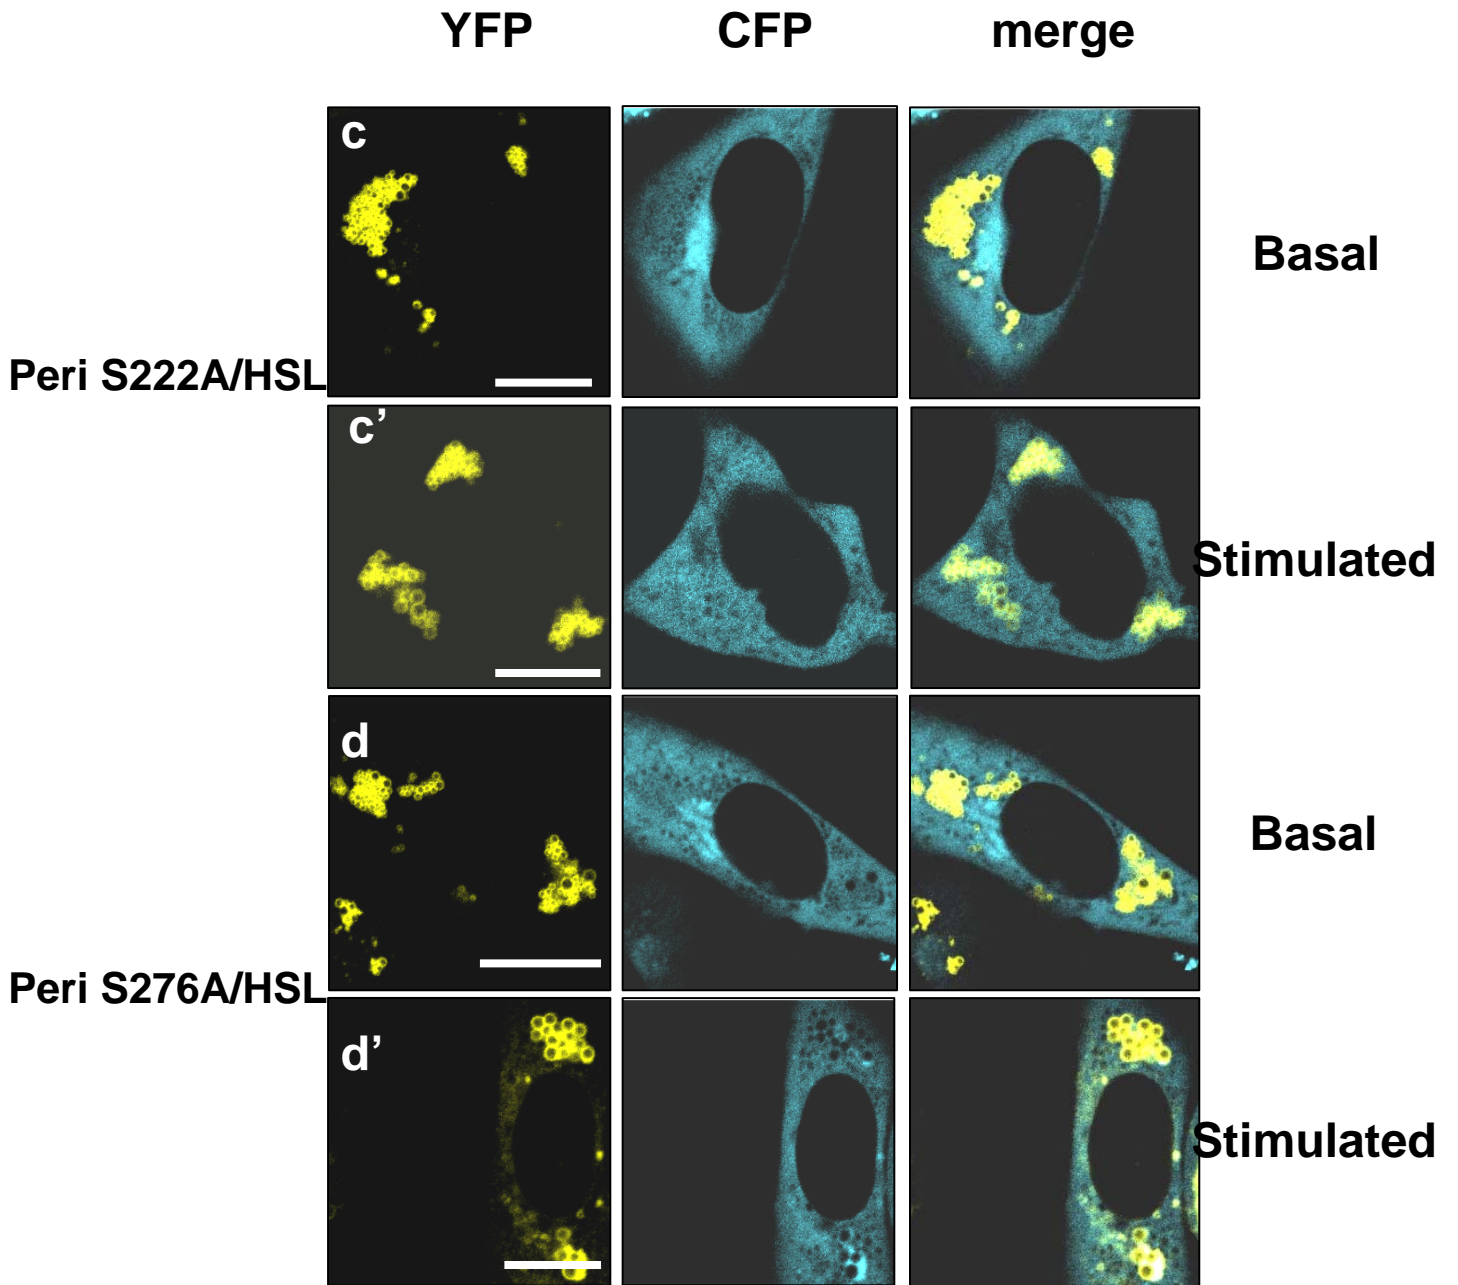

# Supplemental Figure 8

IP: HSL Ab  
WB: GFP Ab

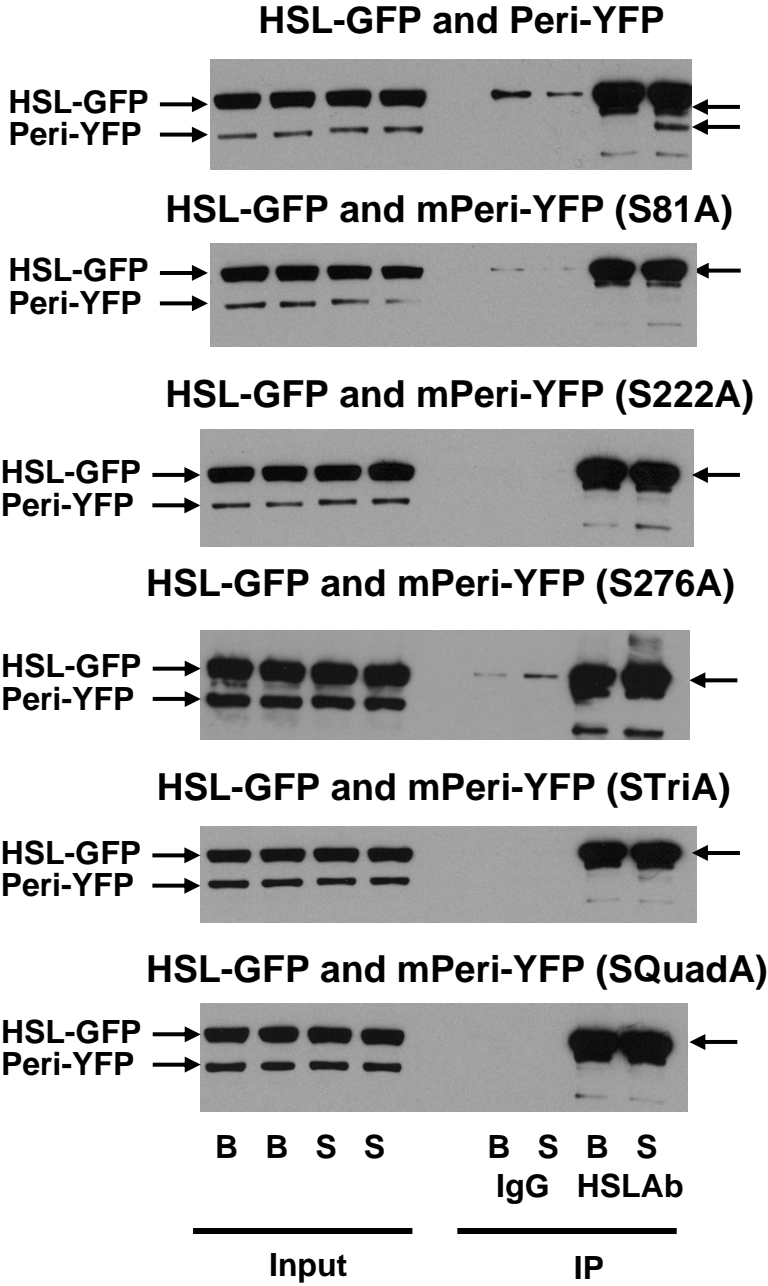

## Supplemental tables

**Table 1 Primers used for constructs**

| <b>Construct Name</b> | <b>PCR Primer Sequence</b>                                                                        | <b>Digestion Sites</b> |
|-----------------------|---------------------------------------------------------------------------------------------------|------------------------|
| HSL-CFP-N1            | Forward 5'-GGCAGATCTGATGGATTTACGCACAATGAC-3'<br>Reverse 5'-ATTTAAAGCTTGGTCAGCGGTGCAGCAGG-3'       | BglII<br>/HindIII      |
| Perilipin-YFP-C1      | Forward 5'-TAGAGCTCGGATGTCAATGAACAAGGGCC-3'<br>Reverse 5'-TAGGTACCGCAGTCTGCTCAGCTCTTCTTGC-3'      | SacI<br>/KpnI          |
| LDSP5-YFP-C1          | Forward 5'-TAGAGCTCAGGAAATGGACCAGAGAGGTGAAG-3'<br>Reverse 5'-TAGGTACCCCTCGATAGTCAGAAGTCCAGCTC-3'  | SacI<br>/KpnI          |
| ADFP-YFP-C1           | Forward 5'-TAGGTACCAAAATGGGAGCAGCAGTAGTGGAT-3'<br>Reverse 5'-TAGGTACCAGGAGGGGTTTACTGAGCTTTGAC-3'  | KpnI<br>/KpnI          |
| Tip47-YFP-C1          | Forward 5'-TAGAGCTCCCATGTCTAGCAATGGTACAGAT-3'<br>Reverse 5'-TAGGTACCTCCCTACTTCCCTTCAGGGGTTT-3'    | SacI<br>/KpnI          |
| CGI-58-CFP-C1         | Forward 5'-CAGTAAGCTTCGAAAGCGATGGCGGCGGAGGA-3'<br>Reverse 5'-CCGTCGGATCCTCAGTCTACTGTGTGGCAGATC-3' | HindIII<br>/BamHI      |

**Table 2**  
**Cell types and antibodies used**

| <b>Protein/protein Interaction</b> | <b>Cell line</b> | <b>Transfection</b>         | <b>Immunoprecipitation antibody</b> | <b>Western Blot antibody</b> |
|------------------------------------|------------------|-----------------------------|-------------------------------------|------------------------------|
| HSL/Perilipin                      | HSL-GFP          | Perilipin-YFP               | HSL                                 | GFP                          |
| HSL/LDSP5                          | HSL-GFP          | LDSP5-YFP                   | HSL                                 | GFP                          |
| HSL/ADFP                           | HSL-GFP          | ADFP-YFP                    | HSL                                 | GFP                          |
| HSL/Tip47                          | HSL-GFP          | Tip47-YFP                   | HSL                                 | GFP                          |
| Perilipin/CGI-58                   | Perilipin A      | CGI-58-C                    | CGI-58                              | Perilipin /CGI-58            |
| Perilipin/LSPD-5                   | CHO-K1           | Perilipin-YFP/<br>LDSP5-YFP | Perilipin/LDSP5                     | GFP                          |
